# Supplementary material for: Behavioral responses of Rhodnius prolixus to volatile organic compounds released in vitro by bacteria isolated from human facial skin
Source: PubMed Central journal article supplement (PMC5933807; doi:10.1371/journal.pntd.0006423), 2018-04-23
Supplement: pntd.0006423.s003.pdf [file pntd.0006423.s003.pdf]

| Volunteer | Morphotype | Identification                                                                                       | Accession number | Query coverage | E value | Maximum identity |
|-----------|------------|------------------------------------------------------------------------------------------------------|------------------|----------------|---------|------------------|
| 1         | 9C         | <i>Dermacoccus nishinomiyaensis</i> partial 16S rRNA gene, isolate PC IW01                           | AM992178.1       | 95%            | 0.0     | 97%              |
|           | 22C        | <i>Staphylococcus epidermidis</i> strain CIFRI CH-TSB-28 16S ribosomal RNA gene, partial sequence    | JF784042.1       | 98%            | 0.0     | 99%              |
|           | 45C        | No gene amplification                                                                                |                  |                |         |                  |
| 2         | 4C         | <i>Staphylococcus epidermidis</i> strain CIFRI H-TSB-12-ZMA 16S ribosomal RNA gene, partial sequence | JF799903.1       | 97%            | 0.0     | 99%              |
|           | 5C         | <i>Staphylococcus epidermidis</i> strain F71055 16S ribosomal RNA gene, partial sequence             | HQ908690.1       | 97%            | 0.0     | 99%              |
|           | 17C        | No gene amplification                                                                                |                  |                |         |                  |
|           | 18C        | <i>Staphylococcus epidermidis</i> gene for 16S rRNA, partial sequence, isolate: T7-3M                | AB617572.1       | 97%            | 0.0     | 97%              |
|           | 19C        | <i>Staphylococcus epidermidis</i> strain FUA2078 16S ribosomal RNA gene, partial sequence            | JN102557.1       | 97%            | 0.0     | 98%              |
| 3         | 12C        | <i>Staphylococcus epidermidis</i> gene for 16S rRNA, partial sequence, isolate: T7-3M                | AB617572.1       | 96%            | 0.0     | 97%              |
|           | 13C        | <i>Staphylococcus capitis</i> subsp. <i>capitis</i> gene for 16S rRNA, partial                       | AB626127.1       | 75%            | 0.0     | 98%              |

|   |     |                                                                                                      |            |      |     |      |
|---|-----|------------------------------------------------------------------------------------------------------|------------|------|-----|------|
|   |     | <i>sequence, strain:<br/>JCM 2420</i>                                                                |            |      |     |      |
|   | 14C | No gene amplification                                                                                |            |      |     |      |
|   | 47C | No gene amplification                                                                                |            |      |     |      |
|   | 48C | No gene amplification                                                                                |            |      |     |      |
| 4 | 1C  | <i>Staphylococcus epidermidis strain FUA2078 16S ribosomal RNA gene, partial sequence</i>            | JN102557.1 | 91%  | 0.0 | 98%  |
|   | 2C  | <i>Bacterium N10 16S ribosomal RNA gene, partial sequence</i>                                        | GQ389785.1 | 91%  | 0.0 | 97%  |
|   | 3C  | <i>Staphylococcus epidermidis gene for 16S rRNA, partial sequence, isolate: T7-3M</i>                | AB617572.1 | 98%  | 0.0 | 97%  |
|   | 36C | Poor template quality                                                                                |            |      |     |      |
|   | 39C | <i>Staphylococcus epidermidis strain CIFRI H-TSB-12-ZMA 16S ribosomal RNA gene, partial sequence</i> | JF799903.1 | 72%  | 0.0 | 98%  |
| 5 | 23  | <i>Micrococcus luteus strain PCSB6 16S ribosomal RNA gene, partial sequence</i>                      | FR750272.1 | 99%  | 0.0 | 99%  |
|   | 24  | <i>Micrococcus luteus strain 5N-5 16S ribosomal RNA gene, partial sequence</i>                       | HQ663910.1 | 100% | 0.0 | 99%  |
|   | 25  | <i>Citrobacter koseri ATCC BAA-895, complete genome</i>                                              | CP000822.1 | 99%  | 0.0 | 99%  |
|   | 27  | <i>Uncultured bacterium clone ncd2780a11c1 16S ribosomal RNA</i>                                     | JF241869.1 | 99%  | 0.0 | 100% |

|   |     |                                                                                          |            |      |     |      |
|---|-----|------------------------------------------------------------------------------------------|------------|------|-----|------|
|   |     | <i>gene, partial sequence</i>                                                            |            |      |     |      |
|   | 28  | Poor template quality                                                                    |            |      |     |      |
|   | 29  | <i>Staphylococcus epidermidis gene for 16S rRNA, partial sequence, isolate: T7-3M</i>    | AB617572.1 | 100% | 0.0 | 99%  |
|   | 30  | Poor template quality                                                                    |            |      |     |      |
|   | 23C | <i>Staphylococcus epidermidis ATCC 12228, complete genome</i>                            | AE015929.1 | 97%  | 0.0 | 99%  |
|   | 34C | <i>Propionibacterium acnes 16S ribosomal RNA gene, partial sequence</i>                  | AF154832.1 | 98%  | 0.0 | 99%  |
| 6 | 1   | <i>Staphylococcus epidermidis clone G08 16S ribosomal RNA gene, partial sequence</i>     | GU003866.1 | 99%  | 0.0 | 99%  |
|   | 3   | <i>Staphylococcus epidermidis gene for 16S rRNA, partial sequence, isolate: T7-3M</i>    | AB617572.1 | 100% | 0.0 | 100% |
|   | 2P* | <i>Staphylococcus epidermidis</i>                                                        | KX901299.1 | 68%  | 0.0 | 99%  |
|   | 4P* | <i>Staphylococcus sp.</i>                                                                | DQ659036.1 | 66%  | 0.0 | 99%  |
|   | 5P* | <i>Staphylococcus epidermidis</i>                                                        | HG799951.1 | 61%  | 0.0 | 99%  |
|   | 6P* | <i>Citrobacter koseri</i>                                                                | CP017665.1 | 85%  | 0.0 | 100% |
|   | 24C | <i>Staphylococcus epidermidis strain F71055 16S ribosomal RNA gene, partial sequence</i> | HQ908690.1 | 94%  | 0.0 | 98%  |
|   | 29C | Poor template quality                                                                    |            |      |     |      |
|   | 30C | <i>Propionibacterium acnes 6609, complete genome</i>                                     | CP002815.1 | 92%  | 0.0 | 97%  |

|   |     |                                                                                                       |            |     |     |     |
|---|-----|-------------------------------------------------------------------------------------------------------|------------|-----|-----|-----|
| 7 | 11  | <i>Citrobacter koseri</i><br>ATCC BAA-895,<br>complete genome                                         | CP000822.1 | 99% | 0.0 | 99% |
|   | 7P* | <i>Staphylococcus caprae</i>                                                                          | KU922215.1 | 96% | 0.0 | 99% |
|   | 25C | <i>Staphylococcus epidermidis</i> strain<br>200 16S ribosomal<br>RNA gene, partial<br>sequence        | EU730936.1 | 99% | 0.0 | 99% |
|   | 31C | <i>Staphylococcus epidermidis</i> partial<br>16S rRNA gene,<br>strain BGHMC5                          | FR797804.1 | 62% | 0.0 | 98% |
|   | 32C | <i>Propionibacterium acnes</i> 6609,<br>complete genome                                               | CP002815.1 | 96% | 0.0 | 99% |
| 8 | 20C | Uncultured<br>bacterium clone<br>HSD-c-Cel9 16S<br>ribosomal RNA<br>gene, partial<br>sequence         | JN698671.1 | 97% | 0.0 | 98% |
|   | 21C | Uncultured<br>bacterium clone<br>ncd594b12c1 16S<br>ribosomal RNA<br>gene, partial<br>sequence        | HM284072.1 | 96% | 0.0 | 98% |
|   | 37C | <i>Staphylococcus epidermidis</i> strain<br>FUA2078 16S<br>ribosomal RNA<br>gene, partial<br>sequence | JN102557.1 | 97% | 0.0 | 98% |
|   | 43C | No gene<br>amplification                                                                              |            |     |     |     |
|   | 44C | No gene<br>amplification                                                                              |            |     |     |     |
| 9 | 15C | <i>Staphylococcus epidermidis</i> strain<br>C490 16S<br>ribosomal RNA<br>gene, partial<br>sequence    | JF803547.1 | 99% | 0.0 | 98% |
|   | 16C | <i>Staphylococcus epidermidis</i> strain<br>F71055 16S<br>ribosomal RNA                               | HQ908690.1 | 97% | 0.0 | 99% |

|    |     |                                                                                           |            |     |     |     |
|----|-----|-------------------------------------------------------------------------------------------|------------|-----|-----|-----|
|    |     | <i>gene, partial sequence</i>                                                             |            |     |     |     |
|    | 41C | Poor template quality                                                                     |            |     |     |     |
|    | 42C | No gene amplification                                                                     |            |     |     |     |
| 10 | 10C | <i>Staphylococcus caprae strain BB2_4A 16S ribosomal RNA gene, partial sequence</i>       | JN644490.1 | 96% | 0.0 | 99% |
|    | 11C | <i>Staphylococcus capitis strain BBN2R-02d 16S ribosomal RNA gene, partial sequence</i>   | FJ357599.1 | 98% | 0.0 | 97% |
|    | 26C | <i>Staphylococcus epidermidis strain FUA2078 16S ribosomal RNA gene, partial sequence</i> | JN102557.1 | 97% | 0.0 | 98% |
|    | 27C | No gene amplification                                                                     |            |     |     |     |
|    | 28C | <i>Staphylococcus sp. DGM MH2a 16S ribosomal RNA gene, partial sequence</i>               | JF923458.1 | 87% | 0.0 | 97% |

\*Isolated by Paola Castillo in her undergraduate practice in 2010.
